# Supplementary material for: Conscientious Objection and Other Motivations for Refusal to Treat in Hastened Death: A Systematic Review
Source: MDPI journal article supplement (doi:10.3390/healthcare11152127), 2023-07-26
Supplement: s1 [file s1]

**Supplement material 1 – Search Strategy of the systematic review****Table S1** - Search strategy of the systematic review for each database

| <b>Data base</b>      | <b>Search strategy</b>                                                                                                                                                                                                                                                                                       |
|-----------------------|--------------------------------------------------------------------------------------------------------------------------------------------------------------------------------------------------------------------------------------------------------------------------------------------------------------|
| <b>PubMed</b>         | (refusal to treat[MeSH Terms])) OR (physician refusal to treat[MeSH Terms]) OR (conscientious objection[Text Word])<br>AND<br>(euthanasia[MeSH Terms]) OR (assisted suicide[MeSH Terms])) OR (assisted suicides[MeSH Terms])<br><br>Search Field: Mesh terms and Text Words<br>Filters: No filters were used |
| <b>Scopus</b>         | “refusal to treat” OR “physician refusal to treat” OR “conscientious objection”<br>AND<br>“euthanasia” OR “assisted suicide” OR “assisted suicides”<br><br>Search Field: Topic<br>Filters: No filters were used                                                                                              |
| <b>Web of Science</b> | “refusal to treat” OR “physician refusal to treat” OR “conscientious objection”<br>AND<br>“euthanasia” OR “assisted suicide” OR “assisted suicides”<br><br>Search Field: Article title, Abstract, Keywords<br>Filters: No filters were used                                                                  |

[illegible][illegible]

---

[illegible]

## Supplementary Materials

**Table S3.** Quality analysis of the quantitative studies included in the systematic review

|                                                                                                                                                                                                                                                                                                                                                                                       | Velasco, 2022 [10]                                                                                                                                                                                                                                | Nordstrand, 2014 [11]                                                                                                                                    |
|---------------------------------------------------------------------------------------------------------------------------------------------------------------------------------------------------------------------------------------------------------------------------------------------------------------------------------------------------------------------------------------|---------------------------------------------------------------------------------------------------------------------------------------------------------------------------------------------------------------------------------------------------|----------------------------------------------------------------------------------------------------------------------------------------------------------|
| Do the study aim/ purpose/ objectives and inclusion/exclusion criteria assist in answering your clinical question? <ul style="list-style-type: none"> <li>• Study Aim/ Purpose/ Objectives</li> <li>• Inclusion Criteria</li> <li>• Exclusion Criteria</li> </ul>                                                                                                                     | Yes<br>Objective: To identify the opinion and attitudes of nurses in the Community of Madrid on the regulation of Euthanasia and Medically assisted suicide in Spain.<br>Inclusion criteria: Members of the Official College of Nurses of Madrid. | Yes<br>Objective: To examine medical students' views on conscientious objection and controversial medical decisions.<br>Inclusion criteria: Not referred |
| Is a cross-sectional study congruent with the author's study aim/ purpose/ objectives above?                                                                                                                                                                                                                                                                                          | Yes                                                                                                                                                                                                                                               | Yes                                                                                                                                                      |
| VALIDITY: Are the results of the cross-sectional study valid or credible?                                                                                                                                                                                                                                                                                                             |                                                                                                                                                                                                                                                   |                                                                                                                                                          |
| 1- Are the study methods clearly described and appropriate for the question? <ul style="list-style-type: none"> <li>• Is the setting clearly described and appropriate?</li> <li>• Was there a representative sample of patients at a well-defined point in the course of the condition of interest?</li> <li>• Is the sample population clearly described and sufficient?</li> </ul> | Yes                                                                                                                                                                                                                                               | Yes                                                                                                                                                      |
| 2- Were the participants similar (homogeneous) with respect to known factors of interest (e.g., demographic, exposure, risk, treatment, or etiology)?                                                                                                                                                                                                                                 | Yes                                                                                                                                                                                                                                               | Yes                                                                                                                                                      |
| 3- Were objective and unbiased criteria used to measure the variable of interest? <ul style="list-style-type: none"> <li>• Was the variable of interest quantifiable and precisely measurable?</li> <li>• Were instruments used to measure the variable of interest tested to be valid and reliable?</li> </ul>                                                                       | Yes                                                                                                                                                                                                                                               | Yes                                                                                                                                                      |
| 4- Was there freedom from conflict of interest? <ul style="list-style-type: none"> <li>• Sponsor/Funding Agency or Investigators</li> </ul>                                                                                                                                                                                                                                           | Yes                                                                                                                                                                                                                                               | Yes                                                                                                                                                      |
| RELIABILITY: Are these valid study results important?                                                                                                                                                                                                                                                                                                                                 |                                                                                                                                                                                                                                                   |                                                                                                                                                          |
| 5- Did the study have a sufficiently large sample size? <ul style="list-style-type: none"> <li>• Was a power analysis described?</li> <li>• Did the sample size achieve or exceed that resulting from the power analysis?</li> <li>• Did each subgroup also have sufficient sample size (e.g., at least 6 to 12 participants)?</li> </ul>                                             | Yes                                                                                                                                                                                                                                               | Yes                                                                                                                                                      |
| 6- Were the statistical analysis methods appropriate? <ul style="list-style-type: none"> <li>• Were the statistical analysis methods clearly described?</li> <li>• If subgroups were evaluated, was a statistical adjustment made for the differences?</li> </ul>                                                                                                                     | Yes                                                                                                                                                                                                                                               | Yes                                                                                                                                                      |

## Supplementary Materials

|                                                                                                                                                                                                                                                                                                                                                                                                                                                                                                                                     |                                                                                                                                                   |                                                                                                                              |
|-------------------------------------------------------------------------------------------------------------------------------------------------------------------------------------------------------------------------------------------------------------------------------------------------------------------------------------------------------------------------------------------------------------------------------------------------------------------------------------------------------------------------------------|---------------------------------------------------------------------------------------------------------------------------------------------------|------------------------------------------------------------------------------------------------------------------------------|
| <p>7- What are the main results of the study? (e.g., Helpful data: Page #, Table #, Figures, Graphs)</p> <ul style="list-style-type: none"> <li>• For a Prevalence Study: What is the rate (e.g., number per population)?</li> <li>• For an Etiology Study: How strong is the association/correlation between known factors and the variable of interest?</li> <li>• What were the measures of statistical uncertainty (e.g., precision)? (Were the results presented with Confidence Intervals or Standard Deviations?)</li> </ul> | Conscientious objection being related with age, years of work experience, model of care and above all religious beliefs. Table 4, Figure 3 and 4. | Moral and religious reasons for conscientious objection were identified. The impact of religion was also discussed. Table 4. |
| 8- . Were the results statistically significant?                                                                                                                                                                                                                                                                                                                                                                                                                                                                                    | Yes                                                                                                                                               | Yes                                                                                                                          |
| <p>9- Were the results clinically significant?</p> <ul style="list-style-type: none"> <li>• If potential confounders were identified, were they discussed in relationship to the results?</li> </ul>                                                                                                                                                                                                                                                                                                                                | Yes                                                                                                                                               | Yes                                                                                                                          |
| APPLICABILITY: Can I apply these valid, important study results to my population?                                                                                                                                                                                                                                                                                                                                                                                                                                                   |                                                                                                                                                   |                                                                                                                              |
| <p>10- Can the results be applied to my population of interest?</p> <ul style="list-style-type: none"> <li>• Is the setting of the study applicable to my population of interest?</li> <li>• Were the participants in this study similar to my population of interest?</li> <li>• Does the variable of interest apply to my population or question of interest?</li> </ul>                                                                                                                                                          | Yes                                                                                                                                               | Yes                                                                                                                          |
| 11- Are my patient's and family's values and preferences satisfied by the knowledge gained from this study?                                                                                                                                                                                                                                                                                                                                                                                                                         | Yes                                                                                                                                               | Yes                                                                                                                          |
| 12- Would you include this study/article in development of a care recommendation?                                                                                                                                                                                                                                                                                                                                                                                                                                                   | Yes                                                                                                                                               | Yes                                                                                                                          |
| QUALITY LEVEL / EVIDENCE LEVEL                                                                                                                                                                                                                                                                                                                                                                                                                                                                                                      | Good Quality Cross-Sectional Study                                                                                                                | Good Quality Cross-Sectional Study                                                                                           |

## Supplementary Materials

**Table S4.** Quality analysis of the expert opinion/review studies included in the systematic review

|                                                                                                                                                                                                                                                                                                              | Pesut, 2019 [12]                             | Carpenter, 2020 [13]                         |
|--------------------------------------------------------------------------------------------------------------------------------------------------------------------------------------------------------------------------------------------------------------------------------------------------------------|----------------------------------------------|----------------------------------------------|
| Do the aim/purpose/objectives assist in answering your clinical question?                                                                                                                                                                                                                                    | Yes                                          | Yes                                          |
| Basic Elements of an Expert Opinion/Review Article                                                                                                                                                                                                                                                           |                                              |                                              |
| 1- Is the author a known expert in the field being studied?                                                                                                                                                                                                                                                  | Yes                                          | Yes                                          |
| 2- Does the author have a known bias?                                                                                                                                                                                                                                                                        | No                                           | No                                           |
| 3- Is the patient population, problem, or issue clearly described?                                                                                                                                                                                                                                           | Yes                                          | Yes                                          |
| 4- Is the literature search clearly described?                                                                                                                                                                                                                                                               | No                                           | No                                           |
| 5- Is the date range of the cited literature appropriate and current?                                                                                                                                                                                                                                        | Yes                                          | Yes                                          |
| 6- What types of research are cited (e.g., animal model, basic science, clinical studies)?                                                                                                                                                                                                                   | Basic science and clinical studies           | Basic science and clinical studies           |
| 7- Is more than one point of view explained, reported, or referenced?                                                                                                                                                                                                                                        | Yes                                          | Yes                                          |
| 8- Were any conclusions clearly presented in the article?<br>• If applicable, were any adverse events clearly described?                                                                                                                                                                                     | Yes                                          | Yes                                          |
| 9- Was there freedom from conflict of interest?<br>• Sponsor/Funding Agency or Authors                                                                                                                                                                                                                       | Unknown                                      | No                                           |
| Applicability: Can I Apply this Expert Opinion / General Review Information?                                                                                                                                                                                                                                 |                                              |                                              |
| 10- Can the results be applied to my population of interest?<br>• Is the setting described in the article applicable to my population of interest?<br>• Do the patient outcomes apply to my population or question of interest?<br>• Were the patients in this article similar to my population of interest? | Yes                                          | Yes                                          |
| 11- Are my patient's and family's values and preferences satisfied by the knowledge gained from this article (such as outcomes considered)?                                                                                                                                                                  | Yes                                          | Yes                                          |
| 12- Would you include this article in development of a care recommendation?                                                                                                                                                                                                                                  | Yes                                          | Yes                                          |
| Quality Level / Evidence Level                                                                                                                                                                                                                                                                               | Good Quality Expert Opinion / General Review | Good Quality Expert Opinion / General Review |

- [1] Clark E, Burkett K, Stanko-Lopp D. Let Evidence Guide Every New Decision (LEGEND): An evidence evaluation system for point-of-care clinicians and guideline development teams. *J Eval Clin Pract.* 2009;15(6):1054-1060. doi:10.1111/j.1365-2753.2009.01314.x
- [2] Bouthillier M-E, Opatrny L. A qualitative study of physicians' conscientious objections to medical aid in dying. *Palliat Med.* 2019;33(9):1212-1220. doi:10.1177/0269216319861921
- [3] Isaac S, McLachlan A, Chaar B. Australian pharmacists' perspectives on physician-assisted suicide (PAS): thematic analysis of semistructured interviews. *BMJ Open.* 2019;9(10). doi:10.1136/bmjopen-2018-028868
- [4] Brown J, Goodridge D, Thorpe L, Crizzle A. "What Is Right for Me, Is Not Necessarily Right for You": The Endogenous Factors Influencing Nonparticipation in Medical Assistance in Dying. *Qual Health Res.* 2021;31(10):1786-1800. doi:10.1177/10497323211008843
- [5] Dumont I, Maclure J. Conscientious objection to medical assistance in dying: A qualitative study with Quebec physicians [Objection de conscience et aide médicale à mourir: Une étude qualitative auprès de médecins Québécois]. *Can J Bioeth.* 2019;2(2):110-134. doi:10.7202/1065691AR
- [6] Haining CM, Keogh LA, Gillam LH. Understanding the Reasons Behind Healthcare Providers' Conscientious Objection to Voluntary Assisted Dying in Victoria, Australia. *J Bioeth Inq.* 2021;18(2):277-289. doi:10.1007/s11673-021-10096-1
- [7] Beuthin R, Bruce A, Scaia M. Medical assistance in dying (MAiD): Canadian nurses' experiences. *Nurs Forum.* 2018;53(4):511-520. doi:10.1111/nuf.12280
- [8] Pesut B, Thorne S, Storch J, Chambaere K, Greig M, Burgess M. Riding an elephant: A qualitative study of nurses' moral journeys in the context of Medical Assistance in Dying (MAiD). *J Clin Nurs.* 2020;29(19-20):3870-3881. doi:10.1111/jocn.15427
- [9] Brown J, Goodridge D, Thorpe L, Crizzle A. "I Am Okay With It, But I Am Not Going to Do It": The Exogenous Factors Influencing Non-Participation in Medical Assistance in Dying. *Qual Health Res.* 2021;31(12):2274-2289.

doi:10.1177/10497323211027130

- [10] Velasco Sanz TR, Cabrejas Casero AM, Rodríguez González Y, Barbado Albaladejo JA, Mower Hanlon LF, Guerra Llamas MI. Opinions of nurses regarding Euthanasia and Medically Assisted Suicide. *Nurs Ethics*. Published online 2022. doi:10.1177/09697330221109940
- [11] Nordstrand SJ, Nordstrand MA, Nortvedt P, Magelssen M. Medical students' attitudes towards conscientious objection: a survey. *J Med Ethics*. 2014;40(9):609-612. doi:10.1136/medethics-2013-101482
- [12] Pesut B, Thorne S, Greig M. Shades of gray: Conscientious objection in medical assistance in dying. *Nurs Inq*. 2019;27(1). doi:10.1111/nin.12308
- [13] Carpenter T, Vivas L. Ethical arguments against coercing provider participation in MAiD (medical assistance in dying) in Ontario, Canada. *BMC Med Ethics*. 2020;21(1). doi:10.1186/s12910-020-00486-2
